# Supplementary material
Source: PubMed Central journal article supplement (PMC8061145)
Supplement: S2045796019000167sup001.pdf [file S2045796019000167sup001.pdf]

## Methodological quality of studies

|                           | Control group | Randomization | Random sequence generation | Drop-out below 5% | Quality of the study |
|---------------------------|---------------|---------------|----------------------------|-------------------|----------------------|
| Altindag et al. (2006)    | yes           | no            | n.a.                       | uncertain         | low                  |
| de Vargas et al. (2013)   | yes           | yes           | uncertain                  | yes               | moderate             |
| Esen Danaci et al. (2016) | no            | n.a.          | n.a.                       | uncertain         | low                  |
| Fernandez et al. (2016)   | yes           | yes           | yes                        | yes               | high                 |
| Iheanacho et al. (2014)   | no            | n.a.          | n.a.                       | no                | low                  |
| Junqueira et al. (2015)   | yes           | yes           | uncertain                  | yes               | moderate             |
| Keynejad et al. (2016)    | no            | n.a.          | n.a.                       | no                | low                  |
| Rong et al. (2011)        | yes           | no            | n.a.                       | uncertain         | low                  |
| Sarikoc et al. (2017)     | yes           | yes           | yes                        | yes               | high                 |

**Table 1. Intervention content**

| Reference                        | Theory | Stigma as a topic | Diagnostic skills | Treatment /interventions /practices | Relationship with patients | Cultural aspects |
|----------------------------------|--------|-------------------|-------------------|-------------------------------------|----------------------------|------------------|
| Altindag <i>et al.</i> (2006)    | X      | X                 |                   | X                                   |                            |                  |
| de Vargas (2013)                 | X      |                   |                   |                                     |                            |                  |
| Esen Danaci <i>et al.</i> (2016) | X      |                   |                   |                                     |                            |                  |
| Fernandez <i>et al.</i> (2016)   | X      | X                 |                   |                                     |                            |                  |
| Iheanacho <i>et al.</i> (2014)   | X      |                   |                   | X                                   | X                          |                  |
| Junqueira <i>et al.</i> (2015)   | X      |                   | X                 | X                                   |                            |                  |
| Keynejad <i>et al.</i> (2016)    |        |                   |                   |                                     |                            | X                |
| Rong <i>et al.</i> (2011)        | X      |                   |                   | X                                   | X                          |                  |
| Sarikoc <i>et al.</i> (2017)     | X      |                   |                   | X                                   |                            |                  |

**Table 2. Didactic methods**

| Reference                        | Lecture | Interactive class | Case study | Role play | Contact (video) | Contact (in person) | Clinical posting | Own practise | Attend interviews |
|----------------------------------|---------|-------------------|------------|-----------|-----------------|---------------------|------------------|--------------|-------------------|
| Altindag <i>et al.</i> (2006)    | X       |                   |            |           | X               | X                   |                  |              |                   |
| de Vargas (2013)                 | X       |                   |            |           |                 |                     | X                |              |                   |
| Esen Danaci <i>et al.</i> (2016) | X       |                   |            |           | X               |                     | X                |              | X                 |

| Reference                      | Lecture | Interactive class | Case study | Role play | Contact (video) | Contact (in person) | Clinical posting | Own practise | Attend interviews |
|--------------------------------|---------|-------------------|------------|-----------|-----------------|---------------------|------------------|--------------|-------------------|
| Fernandez <i>et al.</i> (2016) | X       |                   |            |           | X               | X                   |                  |              |                   |
| Iheanacho <i>et al.</i> (2014) | X       | X                 |            | X         |                 |                     |                  |              |                   |
| Junqueira <i>et al.</i> (2015) | X       | X                 |            |           |                 |                     |                  |              |                   |
| Keynejad <i>et al.</i> (2016)  |         | X                 |            |           |                 |                     |                  |              |                   |
| Rong <i>et al.</i> (2011)      | X       | X                 |            |           | X               |                     |                  |              |                   |
| Sarikoc <i>et al.</i> (2017)   | X       |                   |            | X         |                 |                     |                  |              |                   |

**Table 3. Mental disorders addressed and cultural adaptation of the intervention**

| Reference                        | Depression | Alcohol | Schizophrenia | Mental disorders in general | Cultural adaptation |
|----------------------------------|------------|---------|---------------|-----------------------------|---------------------|
| Altindag <i>et al.</i> (2006)    |            |         | X             |                             |                     |
| de Vargas (2013)                 |            | X       |               |                             |                     |
| Esen Danaci <i>et al.</i> (2016) |            |         | X             |                             |                     |
| Fernandez <i>et al.</i> (2016)   |            |         |               | X                           |                     |
| Iheanacho <i>et al.</i> (2014)   |            |         |               | X                           |                     |
| Junqueira <i>et al.</i> (2015)   |            | X       |               |                             |                     |
| Keynejad <i>et al.</i> (2016)    |            |         |               | X                           |                     |

| <b>Reference</b>             | <b>Depression</b> | <b>Alcohol</b> | <b>Schizophrenia</b> | <b>Mental disorders in general</b> | <b>Cultural adaptation</b> |
|------------------------------|-------------------|----------------|----------------------|------------------------------------|----------------------------|
| Rong <i>et al.</i> (2011)    | X                 |                |                      |                                    | X                          |
| Sarikoc <i>et al.</i> (2017) | X                 |                | X                    |                                    |                            |

## MEDLINE SEARCH STRATEGY

2017-05-06

### 1. Stigma (Mehta et al., 2015; Thornicroft et al., 2016)

Stereotyping/ OR Social Stigma/ OR Prejudice/ OR Attitude/ OR Social Perception/ OR "Attitude of Health Personnel"/ OR Social Distance/ OR "Rejection (Psychology)"/ OR Human Rights/ OR Civil Rights/ OR Social Justice/ OR "Discrimination (Psychology) "/ OR Social discrimination/ OR human rights OR civil rights OR social justice OR discrimination OR injustice OR stigma\* OR stereotyp\* OR social distanc\* OR marginali\*

Additional terms by Henderson et al. (2014): prejudi\* OR Ignoran\* OR Misconception\*1 OR Misperception\*1 OR hostile\* OR emotional reaction OR disrespect\* OR victimi\* OR abusive OR patronis\* OR patroniz\* OR misdiagnos\* OR under treatment OR non treatment OR no access OR less access OR diagnostic overshadow\* OR attitud\* OR behavior\*1 OR behaviour\*1 OR opinion\*1 OR view\* OR assum\* OR judg\*

Additional terms by authors: Professional Competence/ OR Quality of Health Care/ OR Patient Satisfaction/ OR Patient Acceptance of Health Care/ OR Burnout, Professional/ OR case detection OR competen\* OR practice OR skills OR burnout OR dignity OR help-seeking

**Exclude** (from Mehta et al., 2015; Thornicroft et al., 2016)

- 6. Interpersonal Relations/
- 7. public opinion/
- 14. public opinion
- 19. empower\*

### 2. Mental health (Mehta et al., 2015; Thornicroft et al., 2016)

Mental Health/ OR Mental Disorders/ OR Mentally Ill Persons/ OR Somatoform Disorders/ OR Depression/ OR Depression, Postpartum/ OR common mental disorders OR Depressive Disorder/ OR Depressive Disorder, Major/ OR Psychotic Disorders/ or Affective Disorders, Psychotic/ OR Neurotic Disorders/ or Self-Injurious Behavior/ OR Anxiety/ OR Anxiety Disorders/ OR Schizophrenia, Paranoid/ OR Schizophrenia/ OR Bipolar Disorder/ OR Mood Disorders/ OR Obsessive-Compulsive Disorder/ OR Personality Disorders/ OR Eating Disorders/ OR Anorexia Nervosa/ OR Anorexia/ OR Bulimia Nervosa/ or Bulimia/ OR Mental Health Services/ OR mental health OR mental illness OR psychotic OR psychosis OR schizo\* OR bipolar disorder OR manic depression OR OCD OR obsessive compulsive disorder OR anorex\* OR bulimi\*

Additional terms by Henderson et al. (2014): post-traumatic stress OR alcohol\* OR substance OR illicit drugs

Additional terms by authors: OR PTSD OR distress

### 3. Intervention (Mehta et al., 2015; Thornicroft et al., 2016)

randomized controlled trial.pt. OR controlled clinical trial.pt. OR evaluation studies.pt. OR Prospective Studies/ OR Follow-Up Studies/ OR Social Marketing/ OR National Health Programs/ OR Government Programs/ OR Program Development/ OR Learning/ or Multimedia/ or Teaching/ OR Internet/ OR Video-Audio Media/ OR Video Recording/ OR Software/ OR Persuasive Communication/ OR Health Knowledge, Attitudes, Practice/ OR Awareness/ OR Patient Advocacy/ OR Health Promotion/ OR Intervention Studies/ OR Randomized Controlled Trials as Topic/

OR evaluat\* OR intervention\* OR randomi\* OR follow-up OR pre-post OR time series OR time point OR message OR marketing OR program\* OR newsletter\* OR DVD OR website OR compact disc OR stigma resilience OR stigma change OR (stigma\* adj5 cop\*) OR (stigma\* adj5 reduc\*) OR

(discrim\* adj5 reduc\*) OR (stigma\* adj5 challeng\*) OR (discrim\* adj5 challeng\*) OR (stigma\* adj5 combat\*) OR (discrim\* adj5 combat\*) OR (stigma\* adj5 counter\*) OR (discrim\* adj5 counter\*) OR contact OR testimon\* OR mental health literacy OR training

(excluded)

66. Mass Media/  
69. Journalism  
70. Video Games/  
72. Pamphlets/  
73. Advertising as Topic/  
74. Public Relations/  
75. Public Relations/  
77. Famous Persons/  
80. Consumer Advocacy/  
91. campaign  
93. advert\*  
95. public relation\*  
97. newspaper\*  
98. magazine\*  
100. broadcast  
101. radio  
102. television  
103. cinema  
107. movie  
108. film  
109. trailer

#### 4. Health care (Henderson et al., 2014)

health\* professional OR health\* personnel OR Doctor\*1 OR psychiat\* OR clinical psych\* OR nurs\* OR occupational therap\* OR medical student\*1 OR health\* worker\*1 OR paramedic\* OR ambulance service OR mental health social worker\*1 OR Medic\*1 OR Clinician\*1 OR Physician\*1 OR case manager\*1 OR key worker\*1 OR keyworker\*1 OR psychotherapist\*1 OR hospital\* OR a&e OR Emergency department\*1 OR Health\* provider\*1 OR Health\* staff OR general practitioner\*1

Additional terms by authors: Health personnel/ OR Professional-Patient Relations/ OR psychology students

(excluded)

midwi\*  
physiotherap\*  
Pharmacist\*1  
Pharmacy student\*1  
dietitian\*1  
dietician\*1  
Dentist\*1  
Surgeon\*1  
Obstetrician\*1  
Dental hygienist\*1  
Gynaecologist\*

## 5. LMIC country list

Afghanistan.mp OR Albania.mp OR Algeria.mp OR American Samoa.mp OR Angola.mp OR Argentina.mp OR Armenia.mp OR Azerbaijan.mp OR Bangladesh.mp OR Belarus.mp OR Belize.mp OR Benin.mp OR Bhutan.mp OR Bolivia.mp OR Bosnia OR Herzegovina OR Botswana.mp OR Brazil.mp OR Bulgaria.mp OR "Burkina Faso".mp OR Burundi.mp OR "Cape Verde".mp OR Cambodia.mp OR Cameroon.mp OR "Central African Republic".mp OR Chad.mp OR China.mp OR Colombia.mp OR Comoros.mp OR Congo.mp OR Costa Rica.mp OR "Cote d'Ivoire".mp OR Cuba.mp OR Djibouti.mp OR Dominica.mp OR Dominican Republic.mp OR Ecuador.mp OR Egypt.mp OR "El Salvador".mp OR "Equatorial Guinea".mp OR Eritrea.mp OR Ethiopia.mp OR Fiji.mp OR Gabon.mp OR Gambia.mp OR Georgia.mp OR Ghana.mp OR Grenada.mp OR Guatemala.mp OR Guinea.mp OR Guinea-Bissau.mp OR Guyana.mp OR Haiti.mp OR Honduras.mp OR India.mp OR Indonesia.mp OR Iran.mp OR Iraq.mp OR Jamaica.mp OR Jordan.mp OR Kazakhstan.mp OR Kenya.mp OR Kiribati.mp OR Korea.mp OR Kosovo.mp OR Kyrgyzstan.mp OR Laos.mp OR Lebanon.mp OR Lesotho.mp OR Liberia.mp OR Libya.mp OR Macedonia.mp OR Madagascar.mp OR Malawi.mp OR Malaysia.mp OR Maldives.mp OR Mali.mp OR "Marshall Islands".mp. OR Mauritania.mp OR Mauritius.mp OR Mexico.mp OR Micronesia.mp OR Moldova.mp OR Mongolia.mp OR Montenegro.mp OR Morocco.mp OR Mozambique.mp OR Myanmar.mp OR Namibia.mp OR Nepal.mp OR Nicaragua.mp OR Niger.mp OR Nigeria.mp OR Pakistan.mp OR Palau.mp OR Panama.mp OR "Papua New Guinea".mp OR Paraguay.mp OR Peru.mp OR Philippines.mp OR Romania.mp OR Russia.mp OR Rwanda.mp OR Samoa.mp OR "Sao Tome and Principe".mp OR Senegal.mp OR Serbia.mp OR "Sierra Leone".mp OR Melanesia.mp OR Somalia.mp OR "South Africa".mp OR "South Sudan".mp OR "Sri Lanka".mp OR "Saint Lucia".mp OR "Saint Vincent and the Grenadines".mp OR Sudan.mp OR Suriname.mp OR Swaziland.mp OR Syria.mp OR Tajikistan.mp OR Tanzania.mp OR Thailand.mp OR Timor-Leste.mp OR Togo.mp OR Tonga.mp OR Tunisia.mp OR Turkey.mp OR Turkmenistan.mp OR Tuvalu.mp OR Uganda.mp OR Ukraine.mp OR Uzbekistan.mp OR Vanuatu.mp OR Venezuela.mp OR Vietnam.mp OR "West Bank".mp OR Gaza.mp OR Palestine.mp OR Yemen.mp OR Zambia.mp OR Zimbabwe.mp

Afghanistan/ OR Albania/ OR Algeria/ OR American Samoa/ OR Angola/ OR Argentina/ OR Armenia/ OR Azerbaijan/ OR Bangladesh/ OR Belarus/ OR Belize/ OR Benin/ OR Bhutan/ OR Bolivia/ OR "Bosnia and Herzegovina"/ OR Botswana/ OR Brazil/ OR Bulgaria/ OR "Burkina Faso"/ OR Burundi/ OR Cape Verde/ OR Cambodia/ OR Cameroon/ OR Central African Republic/ OR Chad/ OR China/ OR Colombia/ OR Comoros/ OR Congo/ OR Costa Rica/ OR Cote d'Ivoire/ OR Cuba/ OR Djibouti/ OR Dominica/ OR Dominican Republic/ OR Ecuador/ OR Egypt/ OR El Salvador/ OR Equatorial Guinea/ OR Eritrea/ OR Ethiopia/ OR Fiji/ OR Gabon/ OR Gambia/ OR Georgia/ OR Ghana/ OR Grenada/ OR Guatemala/ OR Guinea/ OR Guinea-Bissau/ OR Guyana/ OR Haiti/ OR Honduras/ OR India/ OR Indonesia/ OR Iran/ OR Iraq/ OR Jamaica/ OR Jordan/ OR Kazakhstan/ OR Kenya/ OR Kiribati/ OR "Democratic People's Republic of Korea"/ OR Kosovo/ OR Kyrgyzstan/ OR Laos/ OR Lebanon/ OR Lesotho/ OR Liberia/ OR Libya/ OR "Macedonia (Republic)"/ OR Madagascar/ OR Malawi/ OR Malaysia/ OR Maldives/ OR Mali/ OR Marshall Islands.mp. OR Mauritania/ OR Mauritius/ OR Mexico/ OR Micronesia/ OR Moldova/ OR Mongolia/ OR Montenegro/ OR Morocco/ OR Mozambique/ OR Myanmar/ OR Namibia/ OR Nepal/ OR Nicaragua/ OR Niger/ OR Nigeria/ OR Pakistan/ OR Palau/ OR Panama/ OR Papua New Guinea/ OR Paraguay/ OR Peru/ OR Philippines/ OR Romania/ OR Russia/ OR Rwanda/ OR Samoa/ OR (Sao Tome and Principe).mp OR Senegal/ OR Serbia/ OR Sierra Leone/ OR Melanesia/ OR Somalia/ OR South Africa/ OR South Sudan/ OR Sri Lanka/ OR Saint Lucia/ OR "Saint Vincent and the Grenadines"/ OR Sudan/ OR Suriname/ OR Swaziland/ OR Syria/ OR Tajikistan/ OR Tanzania/ OR Thailand/ OR Timor-Leste/ OR Togo/ OR Tonga/ OR Tunisia/ OR Turkey/ OR Turkmenistan/ OR Tuvalu.mp OR Uganda/ OR Ukraine/ OR Uzbekistan/ OR Vanuatu/ OR Venezuela/ OR Vietnam/ OR West Bank.mp OR Gaza.mp OR Palestine.mp OR Yemen/ OR Zambia/ OR Zimbabwe/

[retrieved from <http://data.worldbank.org/income-level/low-and-middle-income> on 24 March 2017]

## References

- Henderson, C., Noblett, J., Parke, H., Clement, S., Caffrey, A., Gale-Grant, O., . . . Thornicroft, G. (2014). Mental health-related stigma in health care and mental health-care settings. *The Lancet Psychiatry*, *1*(6), 467-482. doi:10.1016/S2215-0366(14)00023-6
- Mehta, N., Clement, S., Marcus, E., Stona, A. C., Bezborodovs, N., Evans-Lacko, S., . . . Thornicroft, G. (2015). Evidence for effective interventions to reduce mental health-related stigma and discrimination in the medium and long term: Systematic review. *British Journal of Psychiatry*, *207*(5), 377-384. doi:10.1192/bjp.bp.114.151944
- Thornicroft, G., Mehta, N., Clement, S., Evans-Lacko, S., Doherty, M., Rose, D., . . . Henderson, C. (2016). Evidence for effective interventions to reduce mental-health-related stigma and discrimination. *The Lancet*, *387*(10023), 1123-1132. doi:[http://dx.doi.org/10.1016/S0140-6736\(15\)00298-6](http://dx.doi.org/10.1016/S0140-6736(15)00298-6)
